# Supplementary material for: A simultaneous 3D printing process for the fabrication of bioceramic and cell-laden hydrogel core/shell scaffolds with potential application in bone tissue regeneration
Source: Royal Society of Chemistry journal article supplement (doi:10.1039/c6tb00849f), 2016-01-01
Supplement: c6tb00849f1.pdf [file c6tb00849f1.pdf]

## Supporting Information

### A simultaneous 3D printing process for fabrication of bioceramic and cell-laden hydrogel core/shell scaffolds for bone tissue regeneration

Naren Raja, Hui-suk Yun \*

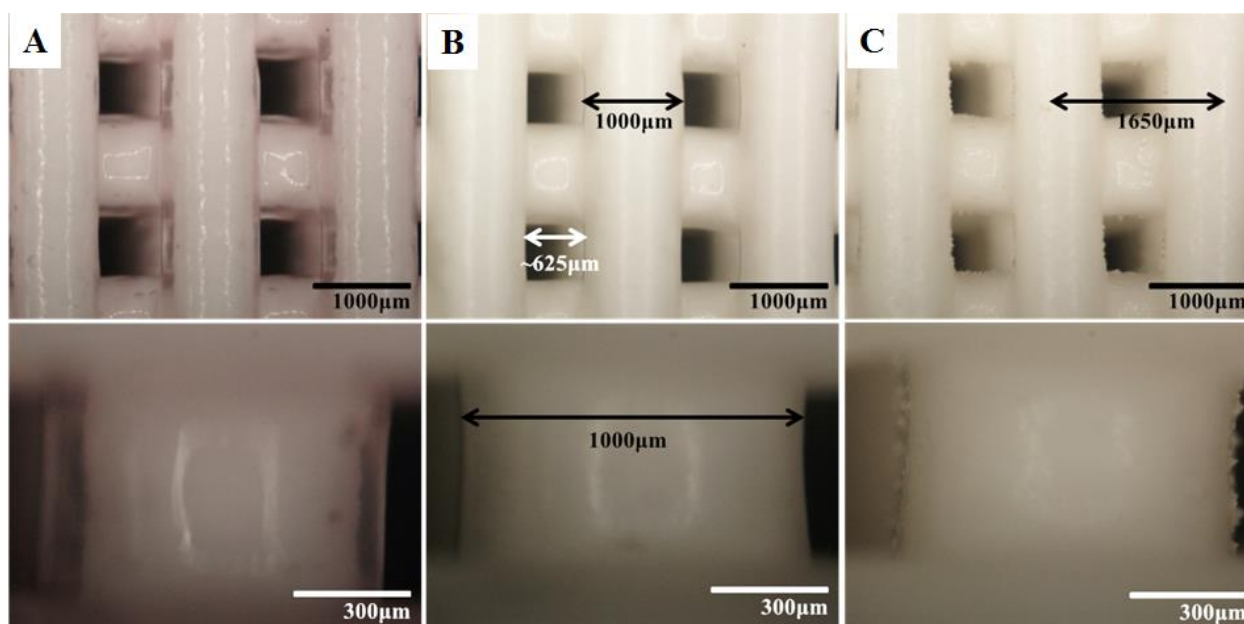

**SI 1.** Optical images of core/shell structures. A: as-printed, B: after crosslinking with 2.5 wt% CaCl<sub>2</sub>, C: after cementation in PBS. The dimensions of the scaffold do not change under any conditions. The strut distance is 1650 μm and the pore size is around 620-650 μm. The strut thickness is maintained at 1000 μm because a 1000 μm nozzle was used to fabricate this scaffold.

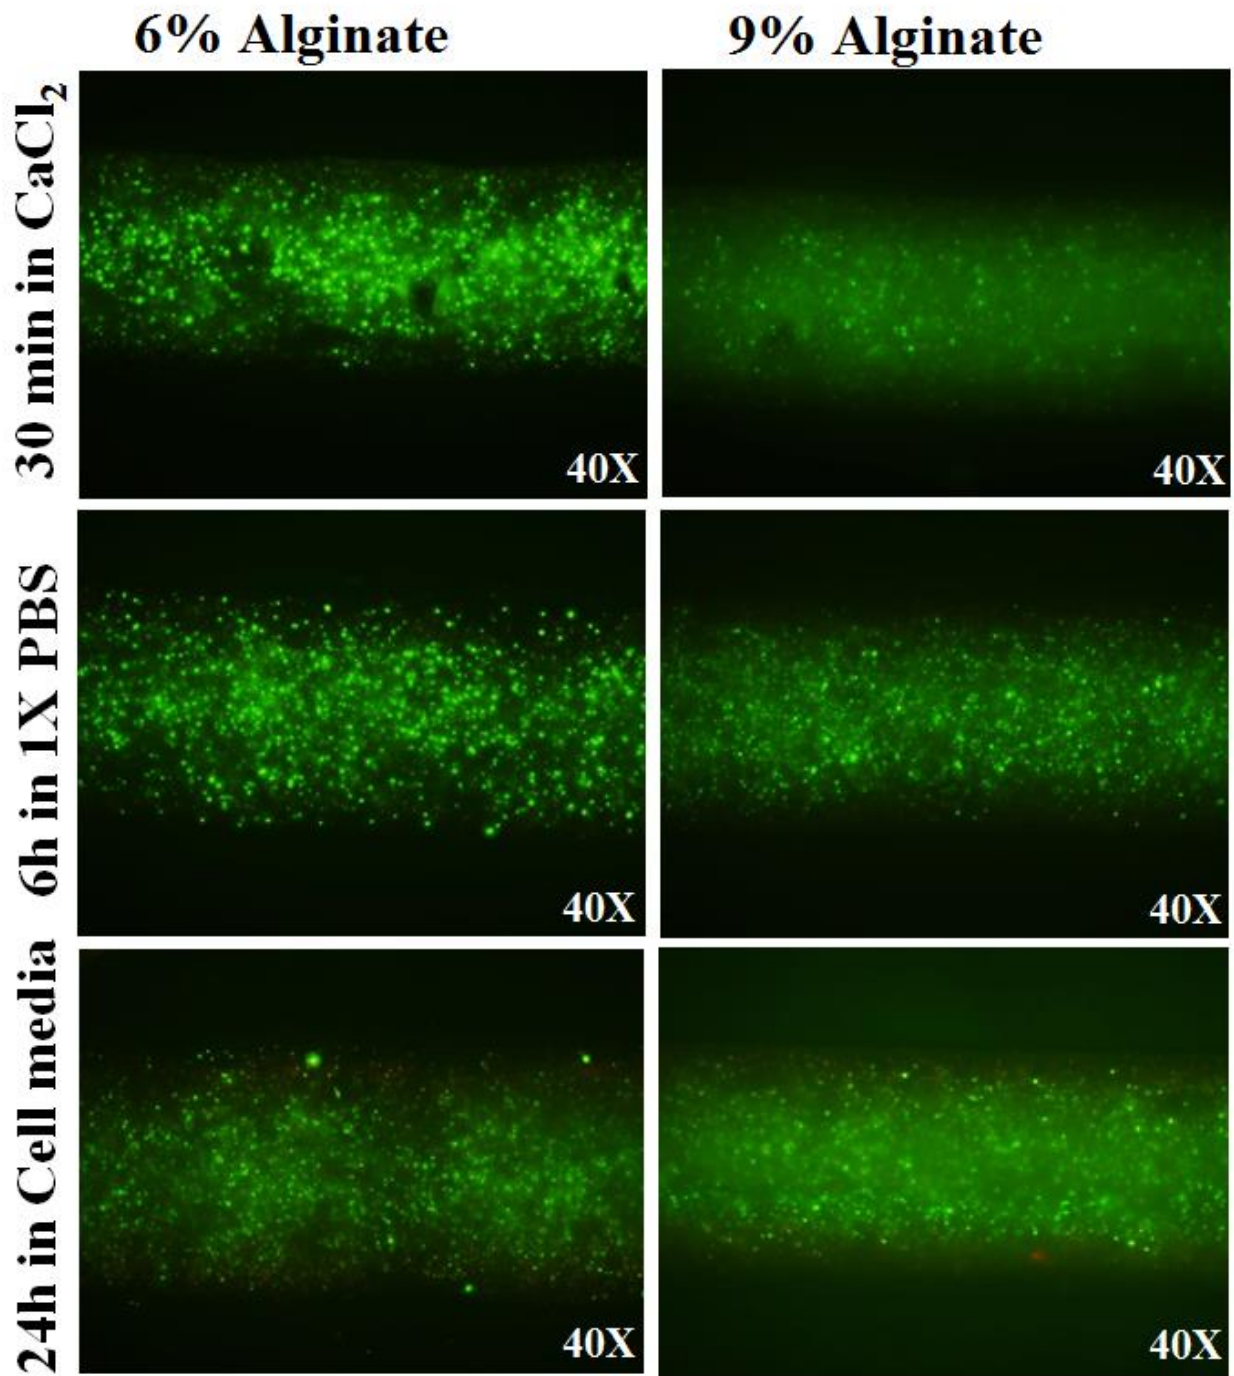

SI. 2. Fluorescence image of cell-laden alginate at different concentrations and reaction conditions in PBS or cell culture medium.

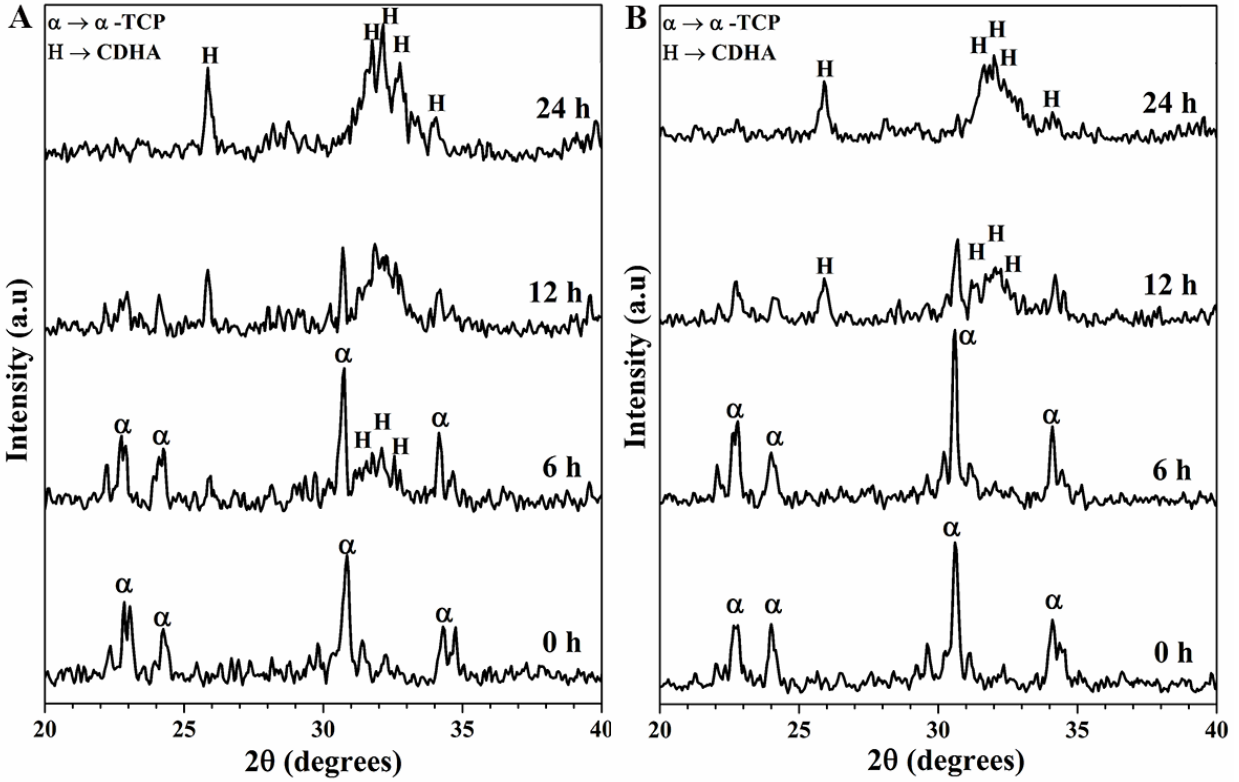

**SI. 3.** Comparison of XRD peaks corresponding to  $\alpha$ -TCP (A) and core/shell (B) scaffolds immersed for 0 (raw  $\alpha$ -TCP powder), 6, 12, and 24 h in PBS. Conversion of  $\alpha$ -TCP to CDHA is initiated by 6 h and is completed by 24 h, as can be seen as the emergence of peaks related to  $\alpha$ -TCP ( $\alpha$ ) and CDHA (H). This process is delayed in the case of core/shell scaffolds, but no secondary phases were detected.

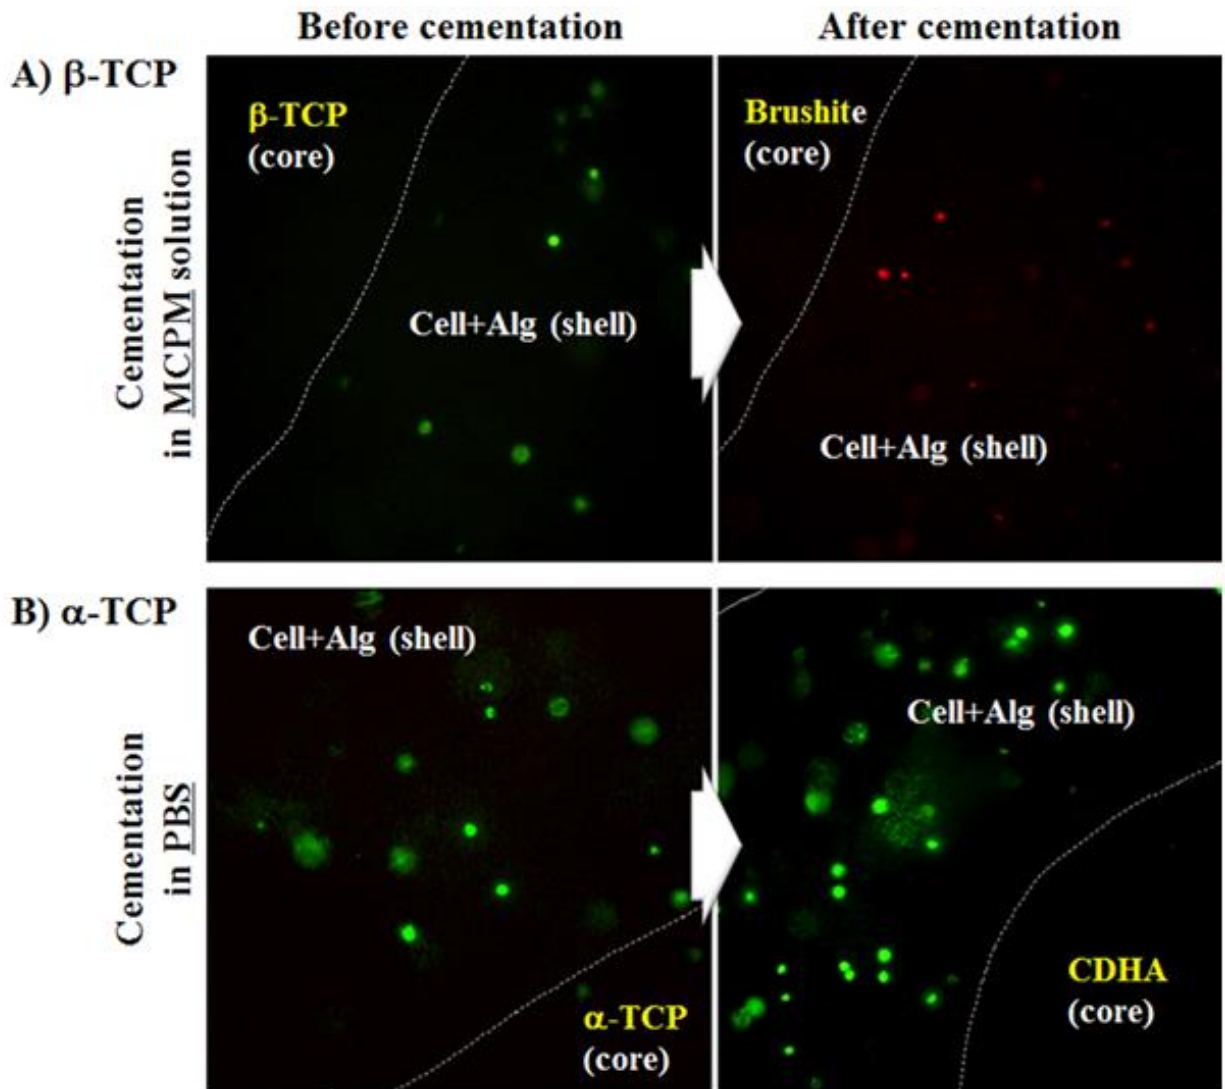

**SI 4.** Comparisons of images of live (green) and dead (red) cells before and after cementation. A) the cell-laden brushite-alginate core/shell scaffolds from  $\beta$ -TCP after a 1 h cementation in monocalcium phosphate monohydrate (MCPM) solution (pH=2.7) and B) the cell-laden calcium deficient hydroxyapatite (CDHA) core/shell scaffolds from  $\alpha$ -TCP after a 6 h cementation in PBS (pH=7.4).

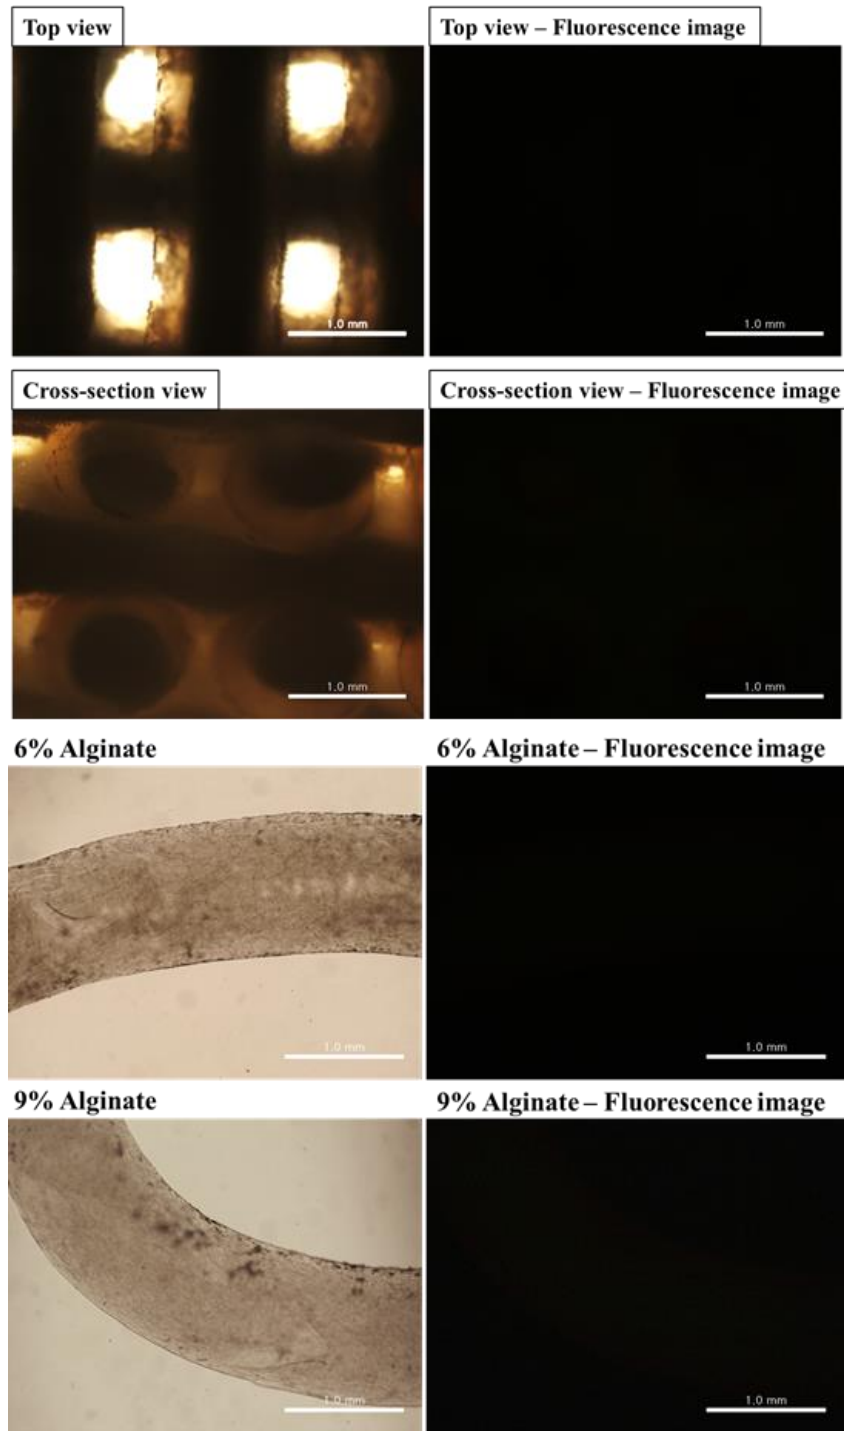

**SI 5.** Fluorescent images of Alginate hydrogel (both 6wt% and 9wt%) and Core-shell scaffolds without cells. Due to absence of cells in the hydrogels, no fluorescence could be observed even after staining with Live-Dead assay. This proves that hydrogel and ceramic core did not contribute to any fluorescence in the assay with cells.
